# Supplementary material for: Investigating the Effect of Surface Hydrophilicity on the Destiny of PLGA-Poloxamer Nanoparticles in an In Vivo Animal Model
Source: MDPI journal article supplement (doi:10.3390/ijms241914523), 2023-09-25
Supplement: s1 [file s1]

## Supplementary information

**Table S1.** Entrapment efficiency and release results

| Sample                       | P NPs ng mL <sup>-1</sup> | PP NPs ng mL <sup>-1</sup> |
|------------------------------|---------------------------|----------------------------|
| <i>Entrapment efficiency</i> |                           |                            |
| Post first centrifugation    | 1307.64                   | 1032.44                    |
| Post second centrifugation   | 821.25                    | 547.00                     |
| Post third centrifugation    | 819.07                    | 513.46                     |
| <i>Release</i>               |                           |                            |
| Mean 1 h                     | 726.39 ± 375.51           | 37.14 ± 27.57              |
| Mean 4 h                     | 700.55 ± 304.54           | 36.39 ± 7.46               |
